Article: Discoveries

# **Targeted sequencing of venom genes from cone snail genomes reveals coupling between dietary breadth and conotoxin diversity**

Mark A Phuong<sup>1</sup>, Gusti N Mahardika<sup>2</sup>

<sup>1</sup>Department of Ecology and Evolutionary Biology, University of California, Los Angeles, CA  
90095, USA

<sup>2</sup>Animal Biomedical and Molecular Biology Laboratory, Faculty of Veterinary Medicine,  
Udayana University Bali, Jl Seseetan-Markisa 6, Denpasar, Bali 80225, Indonesia

## **Corresponding author:**

M. A. Phuong

E-mail: [markphuong@gmail.com](mailto:markphuong@gmail.com)

## 1 **Abstract**

2           Although venomous taxa provide an attractive system to study the genetic basis of adaptation and  
3 speciation, the slow pace of toxin gene discovery through traditional laboratory techniques (e.g., cDNA  
4 cloning) have limited their utility in the study of ecology and evolution. Here, we applied targeted  
5 sequencing techniques to selectively recover venom gene superfamilies and non-toxin loci from the  
6 genomes of 32 species of cone snails (family, Conidae), a hyper diverse group of carnivorous marine  
7 gastropods that capture their prey using a cocktail of neurotoxic proteins (conotoxins). We were able to  
8 successfully recover conotoxin gene superfamilies across all species sequenced in this study with high  
9 confidence (> 100X coverage). We found that conotoxin gene superfamilies are composed of 1-6 exons  
10 and adjacent noncoding regions are not enriched for simple repetitive elements. Additionally, we  
11 provided further evidence for several genetic factors shaping venom composition in cone snails, including  
12 positive selection, extensive gene turnover, expression regulation, and potentially, presence-absence  
13 variation. Using comparative phylogenetic methods, we found that while diet specificity did not predict  
14 patterns of conotoxin gene superfamily size evolution, dietary breadth was positively correlated with total  
15 conotoxin gene diversity. These results continue to emphasize the importance of dietary breadth in  
16 shaping venom evolution, an underappreciated ecological correlate in venom biology. Finally, the  
17 targeted sequencing technique demonstrated here has the potential to radically increase the pace at which  
18 venom gene families are sequenced and studied, reshaping our ability to understand the impact of genetic  
19 changes on ecologically relevant phenotypes and subsequent diversification.

20

## 21 **Introduction**

22           Understanding the molecular basis for adaptation and speciation is a central goal in evolutionary  
23 biology. Past studies have described several genetic characteristics that seem to be associated with rapidly  
24 radiating clades or the evolution of novel phenotypes, including evidence for diversifying selection, gene  
25 gains and losses, and accelerated rates of sequence evolution (Henrissat *et al.* 2012; Guillén *et al.* 2014;  
26 Brawand *et al.* 2014; Cornetti *et al.* 2015; Malmstrøm *et al.* 2016; Pease *et al.* 2016). Although large-

27 scale comparative genomic studies have vastly increased our knowledge of the genetic changes associated  
28 with diversification, the link between genotype and ecologically relevant phenotypes frequently remains  
29 unclear. Often, the functional consequences of genetic patterns such as an excess of gene duplicates or  
30 regions under positive selection are unknown (Brawand *et al.* 2014; Cornetti *et al.* 2015; Pease *et al.*  
31 2016), limiting our ability to understand how genetic changes shape the evolutionary trajectory of species.

32 Animal venoms provide an excellent opportunity to study the interplay between genetics and  
33 adaptation because of the relatively simple relationship between genotype, phenotype, and ecology.  
34 Venoms have evolved multiple times throughout the tree of life (e.g., spiders, snakes, and snails) and play  
35 a direct role in prey capture and survival (Barlow *et al.* 2009; Casewell *et al.* 2013). Venoms are  
36 composed of mixtures of toxic proteins and peptides that are usually encoded directly by a handful of  
37 known gene families (Kordis & Gubensek 2000; Fry *et al.* 2009; Casewell *et al.* 2013). Exceptionally  
38 high estimated rates of gene duplication and diversifying selection across these venom genes families are  
39 thought to contribute to the evolution of novel proteins and thus changes in venom composition (Duda &  
40 Palumbi 1999; Gibbs & Rossiter 2008; Chang & Duda 2012), allowing venomous taxa to specialize and  
41 adapt onto different prey species (Kohn 1959a; Daltry *et al.* 1996; Li *et al.* 2005; Barlow *et al.* 2009;  
42 Chang & Duda 2016; Phuong *et al.* 2016). Therefore, the study of venomous taxa can facilitate  
43 understanding of the genetic contributions to ecologically relevant traits and subsequent diversification.

44 A fundamental challenge associated with the study of venom evolution is the inability to rapidly  
45 obtain sequences from venomous multi-gene families. Traditionally, venom genes were sequenced  
46 through cDNA cloning techniques, which can be labor intensive and time-consuming (Gibbs & Rossiter  
47 2008; Chang *et al.* 2015). Although transcriptome sequencing has greatly increased the pace of venom  
48 gene discovery (e.g., Casewell *et al.* 2009; Phuong *et al.* 2016), transcriptome sequencing still requires  
49 fresh RNA extracts from venom organs, which may be difficult to obtain for rare and/or dangerous  
50 species. Targeted sequencing approaches have vastly improved the capacity to obtain thousands of  
51 markers across populations and species for ecological and evolutionary studies (Faircloth *et al.* 2012; Bi  
52 *et al.* 2012). Until now, these approaches have not been applied to selectively sequence venomous

53 genomic regions. This may be in part, due to the extraordinary levels of sequence divergence exhibited by  
54 venom loci (Gibbs & Rossiter 2008; Chang & Duda 2012), potentially rendering probes designed from a  
55 single sequence from one gene family unable to recover any other sequences in the same family (Fig. 1).  
56 However, past studies have shown that noncoding regions adjacent to hypervariable mature toxin exons  
57 are conserved between species (Nakashima *et al.* 1993, 1995; Gibbs & Rossiter 2008; Wu *et al.* 2013),  
58 suggesting that these conserved regions can be used for probe design to potentially recover all venom  
59 genes across clades of venomous taxa.

60 Here, we used a targeted sequencing approach to recover venom genes and study the evolution of  
61 venom gene families across 32 species of cone snails from the family, Conidae. Cone snails are a hyper  
62 diverse group of carnivorous marine gastropods (> 700 spp.) that capture their prey using a cocktail of  
63 venomous neurotoxins (Puillandre *et al.* 2014). Cone snail venom precursor peptides (conotoxins) are  
64 typically composed of three regions: the signal region that directs the protein into the secretory pathway,  
65 the prepro region that is cleaved during protein maturation, and the mature region that ultimately becomes  
66 the mature peptide (Robinson & Norton 2014). In some instances, there exists a ‘post’ region of the  
67 peptide following the mature region that is also cleaved during protein processing (Robinson & Norton  
68 2014). Conotoxins are classified into > 40 gene superfamilies (e.g., A superfamily, O1 superfamily, etc.)  
69 based on signal sequence identity, though some gene superfamilies were identified based on domain  
70 similarities to proteins from other venomous taxa (Robinson & Norton 2014). To examine the evolution  
71 of conotoxin gene superfamilies from genomic DNA, we designed probes targeting over 800 non-  
72 conotoxin genes for phylogenetic analyses and conotoxins from 12 previously sequenced Conidae  
73 transcriptomes (Phuong *et al.* 2016). With the recovered conotoxin loci, we describe several features of  
74 conotoxin genes, including its genetic architecture, molecular evolution, expression patterns, and changes  
75 in gene superfamily size. Finally, we use comparative phylogenetic methods to test whether diet  
76 specificity or dietary breadth can explain patterns of gene superfamily size evolution.

77

78 **Results**

79

80 *Exon capture results*

81 We used custom designed 120bp baits (MYbaits; Mycroarray, Ann Arbor, Michigan, USA) to selectively  
82 target phylogenetic markers and conotoxin genes from 32 Conidae species (Table S1). We sequenced all  
83 samples on a single Illumina HiSeq2000 lane, producing an average of 12.8 million reads per sample  
84 (Table S1). After redefining exon boundaries for the phylogenetic markers, we generated a reference that  
85 consisted of 5883 loci. We recovered an average of 5335 loci (90.7%) across all samples representing  
86 ~0.66 Mb (Megabases) on average (Table S1). For the conotoxin genes, the number of gene models we  
87 assembled containing a conotoxin exon ranged from 281 fragments in *Conus papilliferus* to 2278  
88 fragments in *C. aristophanes* (Table S1). Approximately 48.8% of the reads mapped to both the  
89 phylogenetic markers and venom genes with 52.3% of these reads being marked as duplicates (Table S1).  
90 Average coverage across the phylogenetic markers was 95.9X, while the average coverage for the  
91 conotoxin exons was 149.6X (Table S1).

92 We recovered representative exons from all 49 conotoxin gene superfamilies targeted, plus exons  
93 from the Q gene superfamily which we did not explicitly target (Fig. S1). Of the 49 targeted gene  
94 superfamilies, ‘capture success’ (defined in Materials and Methods) was 80% or above for 34 gene  
95 superfamilies, even though we did not explicitly target every single transcript (Table S2). For example,  
96 we only targeted 1 sequence of the A gene superfamily from *C. varius*, but we recovered sequences that  
97 showed high identity to every single transcript from the A gene superfamily discovered in the *C. varius*  
98 transcriptome (Table S2). We assessed the ability of targeted sequencing to recover conotoxins from  
99 species that were not explicitly targeted in the bait sequences by calculating the number of previously  
100 sequenced conotoxins (obtained via Genbank and Conoserver (Kaas *et al.* 2010)) recovered in our dataset.  
101 The number of previously sequenced conotoxins from online databases recovered in this study did not  
102 differ depending on whether or not a species was explicitly targeted by our bait design (t-test,  $t = -0.8$ ,  $df$   
103  $= 20.1$ ,  $p\text{-value} > 0.05$ , Table S3).

104

105 *Conotoxin genetic architecture*

106 Through analyses of conotoxin genetic structure across species, we found that the number of exons that  
107 comprise a conotoxin transcript ranged from 1 to 6 exons and exon size ranged from 5bp to 444bp (Table  
108 S4). Whether or not untranslated regions (UTRs) were adjacent to terminal exons was dependent on the  
109 gene superfamily, with some gene superfamilies always having both 5' and 3' UTRs adjacent to terminal  
110 exons and some where the 5' or 3' UTRs cannot be found directly adjacent to the terminal exons (Table  
111 S4). Regions in conotoxin transcripts identified as the signal region, the mature region, or the post region  
112 were most often confined to a single exon (Fig. 2). In contrast, the prepro region was more frequently  
113 distributed across more than one exon (Fig. 2).

114 Because preliminary studies on conotoxin genetic structure suggested that conotoxin introns are  
115 enriched for simple repeats (Wu *et al.* 2013; Barghi *et al.* 2015a), we assessed simple repeat content in  
116 noncoding regions from both conotoxin and non-conotoxin loci. The percentage of contigs containing a  
117 simple repeat in noncoding regions adjacent to conotoxin exons (avg = 52.8%) was lower compared to  
118 non-conotoxin loci (avg = 55.6%, Table S5). The percentage length of simple repeats in noncoding  
119 regions near conotoxins (avg = 2.9%) was higher than in non-conotoxin loci (avg = 2.6%, Table S5).  
120 While paired t-tests found significant differences in the means in both measures of simple repeat  
121 abundance, the differences of the means were quite small in both the percentage of contigs containing  
122 simple repeats in noncoding regions (diff = 2.8%,  $t = -3.05$ ,  $df = 31$ ,  $p\text{-value} = 0.005$ ) and the percentage  
123 length of simple repeats in these regions (diff = 0.3%,  $t = 4.53$ ,  $df = 31$ ,  $p\text{-value} < 0.0001$ ).

124

125 *Conotoxin molecular evolution*

126 To determine if there are differences in divergence depending on what conotoxin precursor peptide region  
127 each exon contains, we quantified the level of sequence divergence between exons and immediately  
128 adjacent noncoding regions. Exons containing the signal region were more conserved than their adjacent  
129 regions (average relative ratio  $< 1$ , Table S6, Fig. 3, S2). In contrast, all other exon classifications  
130 generally showed the opposite pattern, where the exons were typically more divergent relative to their

131 adjacent noncoding regions (average relative ratio > 1, Table S6, Fig. 3, S2). The largest contrast in  
132 divergence between exons and adjacent noncoding regions came from exons containing the mature  
133 region, where the coding region was on average 2.9 times more divergent than regions surrounding the  
134 exon (Table S6, Fig. 3, S2). For comparison, exons from non-conotoxin genes were more conserved than  
135 their adjacent regions (relative exon to adjacent region divergence ratio < 1, Fig. 3).

136

### 137 *Conotoxin expression*

138 The proportion of conotoxin genes expressed per gene superfamily was highly variable (Table S7) and the  
139 exact proportion depended on the gene superfamily and the species. In several cases, all gene copies of a  
140 gene superfamily were not expressed in the transcriptome (e.g., *Conus ebraeus*, A gene superfamily, 0/9  
141 copies expressed, Table S7), and in other cases, all copies were expressed in the transcriptome (e.g., *C.*  
142 *californicus*, O3 gene superfamily, 3/3 copies expressed, Table S7). The average proportion of gene  
143 copies expressed per gene superfamily per species was 45% (range: 24% – 63%, Table S7).

144

### 145 *Conotoxin gene superfamily size evolution*

146 With a concatenated alignment of 4441 exons representing 573854bp, we recovered a highly supported  
147 phylogeny with all but 4 nodes having  $\leq 95\%$  bootstrap support (Fig. 4). Total conotoxin gene diversity  
148 ranged from as low as 120 in *C. papilliferus* to as high as 859 in *C. coronatus* (Fig. 4). 25 gene  
149 superfamilies showed evidence of phylogenetic signal in gene superfamily size, such that closely related  
150 species tended to have similar gene superfamily sizes (Table S8). For example, nearly all of the gene  
151 copies from the A superfamily in a clade consisting of *C. mustelinus*, *C. capitaneus*, *C. miles*, *C. vexillum*,  
152 and *C. rattus* seemed to have been lost from the genome, while a clade composed of *C. lischkeanus*, *C.*  
153 *muriculatus*, and *C. lividus* seemed to have expanded in membership size (Fig. 4). CAFE (Han *et al.*  
154 2013) estimates of net gene gains and losses showed that species-specific net conotoxin expansions and  
155 contractions are scattered throughout the phylogeny (Fig. 4, Fig. S3).

156

157 *Diet and conotoxin gene superfamily evolution*

158 We used comparative phylogenetic methods and extensive prey information from the literature to  
159 examine the impact of diet specificity (i.e. what prey a cone snail feeds upon) and dietary breadth (i.e.,  
160 how many prey species a cone snail feeds upon) on the evolution of conotoxin gene diversity. Neither diet  
161 specificity nor dietary breadth was correlated in changes with gene superfamily size (D-PGLS [distance-  
162 based phylogenetic generalized least squares],  $p > 0.05$ ). While diet specificity did not predict changes in  
163 total conotoxin diversity (PGLS,  $p > 0.05$ ), we found a significant positive relationship between dietary  
164 breadth and total conotoxin diversity in both the full conotoxin dataset (PGLS,  $p < 0.05$ , Fig. 5) and the  
165 conotoxin dataset containing gene superfamilies that had  $> 80\%$  capture success (PGLS,  $p < 0.001$ ).

166

167 **Discussion**

168 *Targeted sequencing and conotoxin discovery*

169 Through targeted sequencing of conotoxins in cone snails, we demonstrate the potential to rapidly obtain  
170 venom sequences at high coverage ( $> 100X$ , Table S1) from species for which no venom information is  
171 available and without the need of RNA from the venom duct. This is remarkable, given that alignments in  
172 amino acid sequences between mature regions of a single gene superfamily within a single individual can  
173 be incomprehensible (Fig. 1) due to the high evolutionary rates of the mature region (Duda & Palumbi  
174 1999). Effective capture of conotoxin gene superfamilies was possible in part because conotoxin exons  
175 were often directly adjacent to conserved UTRs, which were targeted in the design (Table S4). For several  
176 gene superfamilies, exons containing the prepro region or the mature region were not immediately  
177 adjacent to the UTRs – thus, these gene superfamilies were not as effectively recovered from species not  
178 explicitly targeted by the baits (e.g., prepro region, gene superfamily O3, Fig. S1). However, we  
179 recovered intron sequences in this study that can be used in future bait designs to anchor probes to  
180 effectively recover the entire coding region of a conotoxin transcript because adjacent noncoding regions  
181 are often evolving at a much slower rate than the coding region (Table S6, Fig. 3, S2). While it has been  
182 recognized for decades that cone snails collectively harbor tens of thousands of biologically relevant



183 proteins for fields such as molecular biology and pharmacology in their venoms (Olivera & Teichert  
184 2007; Lewis 2009), traditional techniques for conotoxin sequencing (e.g., cDNA cloning) have barely  
185 begun to uncover and characterize the full breadth of conotoxin diversity. The targeted sequencing  
186 technique presented in this study has the potential to fundamentally reshape the speed at which  
187 conotoxins are discovered, potentially having significant implications for the study of conotoxins in  
188 molecular biology, pharmacology, ecology, and evolution.

189         When compared to conotoxin sequences available on Genbank and ConoServer, we found that we  
190 were able to recover approximately the same proportion of previously sequenced conotoxins across  
191 species regardless of whether the species was explicitly targeted with the baits (Table S3). We performed  
192 a coarse investigation of database conotoxins and determined potential reasons for why we were not able  
193 to recover certain previously sequenced conotoxins. These reasons include: (a) the species in the database  
194 was misidentified, (b) the database conotoxin had no reliable reference in the literature, (c) the conotoxin  
195 was present in our species, but we could not recover it with the current bait design, and (d) the conotoxin  
196 was recoverable (i.e., high sequence similarity to bait sequences designed in this study), but the gene was  
197 not present in the genome of the individual used in this study, indicative of presence-absence variation  
198 shaping the venom repertoire of cone snail species. Future studies studying the genomic content of  
199 conotoxins from the genome will enable understanding of the contributions of presence-absence variation  
200 to the evolution of cone snail venom composition.

201

### 202 *Genetic characteristics of conotoxins*

203         Previous studies noted the enrichment of simple repetitive elements (e.g., ATATATAT) in  
204 noncoding regions adjacent to conotoxin loci, suggesting that these repetitive regions may be important  
205 for conotoxin gene splicing and the regulation of gene expression (Wu *et al.* 2013; Barghi *et al.* 2015a).  
206 Although our comparisons of simple repeat content between conotoxin and non-conotoxin exons showed  
207 that a higher proportion of contigs contained simple repeats near non-conotoxin exons and simple repeats  
208 constituted a greater proportion of noncoding length near conotoxin exons, these differences were quite

209 small (Table S5), suggesting that the presence of simple repeats are not unique to conotoxins. This  
210 discrepancy occurred between this study and past work because previous studies did not compare repeat  
211 content to non-conotoxin loci (Wu *et al.* 2013; Barghi *et al.* 2015a), underscoring the importance of  
212 making appropriate comparisons to identify features that may be exclusive to conotoxin evolution.

213         The ratio of exon to noncoding divergence depended on what conotoxin region was encoded by  
214 the exon, aligning with previous work characterizing rate variation in snake venom proteins (Nakashima  
215 *et al.* 1993, 1995; Gibbs & Rossiter 2008). Specifically, the exon containing the signal region was  
216 conserved and evolved much more slowly than adjacent noncoding regions (Table S6, Fig. 3, S2). This is  
217 similar to the pattern found in non-conotoxin exons (Fig. 3), indicative of purifying selection removing  
218 deleterious mutations from coding regions of critically important proteins (Hughes & Yeager 1997). In  
219 contrast, the exon diverges faster than the noncoding regions in all other exons, with the clearest  
220 difference between exon and noncoding region divergence seen in the exon containing most or all of the  
221 mature toxin region. This same pattern is also seen in other genes under positive selection, such as PLA2  
222 genes in snakes (Nakashima *et al.* 1993, 1995; Gibbs & Rossiter 2008) and fertilization genes in abalone  
223 (Metz *et al.* 1998). Although we did not use traditional methods to test for positive selection (e.g., MK  
224 tests, etc.), positive selection is well documented in cone snails (Duda & Remigio 2008; Duda 2008;  
225 Puillandre *et al.* 2010) and is therefore inferred to shape patterns of increased divergence in coding  
226 regions relative to noncoding regions.

227         We found that on average, cone snails only express a fraction of the conotoxin genes available in  
228 their genomes, concurring with similar reports from smaller sets of gene superfamilies (Chang & Duda  
229 2012, 2014; Barghi *et al.* 2015a). Several reasons could lead to this pattern. First, it is known that  
230 expression changes throughout an individual's lifetime in cone snails (Barghi *et al.* 2015b; Chang &  
231 Duda 2016), suggesting that the complement of genes expressed in the transcriptomes from Phuong *et al.*  
232 2016 represent the adult conotoxins, and genes not discovered in the transcriptome but recovered from the  
233 genome are genes that are expressed in other life stages. Second, prey taxa available to cone snail species  
234 change with geography and so do the conspecifics it must compete against (Kohn 1959a, 1978; Kohn &

235 Nybakken 1975; Duda & Lee 2009; Chang *et al.* 2015); therefore, different genes may be turned on or off  
236 in different geographic localities depending on the prey resources available and the composition of  
237 competitors in an individual's environment. Finally, some of the conotoxin genes in the genome may not  
238 be expressed because they are no longer functional and have become pseudogenized. Future work  
239 comparing patterns of expression relative to genomic availability will be able to disentangle the impact of  
240 conotoxin expression on changes to the venom phenotype.

241 We detected evidence for phylogenetic signal in the membership size of 25 gene superfamilies  
242 (Table S8, Fig. 4), suggesting that history plays a role in shaping gene gains and losses in cone snails. We  
243 note that uncovering evidence for phylogenetic signal in gene superfamily size does not imply that natural  
244 selection has not played a role in the evolution of venom as implied in (Gibbs *et al.* 2013). As described  
245 in Revell *et al.* (2008), evolutionary processes should not be inferred from patterns of phylogenetic signal  
246 because several contrasting models of trait evolution can lead to similar amounts of phylogenetic signal.  
247 Through CAFE analyses, we also showed that venom composition is shaped by both net gains and losses  
248 in the entire genomic content of conotoxins (Fig. 4, Fig. S3). This result is in line with past studies  
249 showing that gene turnover is a fundamental characteristic shaping species' genic venom content (Duda &  
250 Palumbi 1999; Chang & Duda 2012; Dowell *et al.* 2016).

251

## 252 *Diet and venom evolution*

253 Why do cone snails vary in conotoxin gene superfamily size? Contrary to the popular assumption that  
254 particular gene superfamilies are associated with certain prey items (e.g. Kaas *et al.* 2010; Jin *et al.* 2013),  
255 diet categories did not predict changes in gene superfamily size or total conotoxin diversity. This result  
256 aligns with a growing body of literature suggesting that the specific prey a species feeds upon may not  
257 accurately predict patterns of conotoxin evolution (Puillandre *et al.* 2012; Chang *et al.* 2015; Phuong *et*  
258 *al.* 2016). While dietary breadth also did not predict changes in gene superfamily size, we found a  
259 significant positive relationship with total conotoxin diversity (Fig. 5), aligning with several studies  
260 showing a tight coupling between dietary breadth and venom gene diversity in cone snails at nearly all

261 biological scales of organization (Duda & Lee 2009; Chang *et al.* 2015; Chang & Duda 2016; Phuong *et*  
262 *al.* 2016). The importance of dietary breadth shaping venom evolution remains underappreciated and  
263 untested in other venomous systems despite strong signals across several studies in cone snails. Future  
264 work examining the role of dietary breadth in shaping the evolution of venom in other venomous taxa will  
265 greatly advance our understanding between the interplay between diet and venom. The lack of a  
266 relationship between dietary breadth and changes in conotoxin gene superfamily size suggests that venom  
267 should be characterized as an aggregate trait rather than decomposed into individual parts to fully assess  
268 the impact of dietary breadth on conotoxin evolution. Indeed, conotoxin gene superfamilies provide little  
269 information on protein function and it is known that proteins with similar functions can evolve  
270 convergently in different gene superfamilies (Kaas *et al.* 2010; Puillandre *et al.* 2012; Robinson & Norton  
271 2014). Further, studies have documented synergistic and complementary effects of conotoxins on prey  
272 species, suggesting that selection may act on the entire cocktail rather than individual components  
273 (Olivera 1997).

274

### 275 *Conclusions*

276 Through targeted sequencing of conotoxin genes, we provide additional evidence for several genetic  
277 characteristics that shape venom composition in cone snails, including presence-absence variation,  
278 positive selection, regulation of gene expression, and gene turnover. In addition, we find that variation in  
279 conotoxin diversity tracks changes in dietary breadth, suggesting that species with more generalist diets  
280 contain a greater number of conotoxin genes in their genome. Given that increased gene diversity is  
281 thought to confer an increased capacity for evolutionary change and species diversification (Kirschner &  
282 Gerhart 1998; Yang 2001; Malmstrøm *et al.* 2016), generalist species may speciate at faster rates than  
283 species with specialist diets. The targeted sequencing technique presented in this paper provides the  
284 necessary methodological advancement to rapidly sequence toxin genes across diverse clades of species,  
285 allowing tests of the relationship between ecology, toxin gene diversity, and higher order biodiversity  
286 patterns to be realized in future work.

287

## 288 **Materials and Methods**

289

### 290 *Bait design and data collection*

291 To recover markers for phylogenetic analyses, we targeted 886 protein coding genes representing  
292 728,860bp. 482 of these genes were identified to be orthologous in Pulmonate gastropods (Teasdale *et al.*  
293 2016) and we identified the remaining 404 genes using a reciprocal blast approach with 12 Conidae  
294 transcriptomes from (Phuong *et al.* 2016). For each gene, we chose the longest sequence from one of the  
295 12 Conidae transcriptomes as the target sequence. For 421 of these genes, we used the entire length of the  
296 sequence as the target sequence, while for the remaining genes, we sliced the target sequences into  
297 smaller components based on exon/intron boundaries inferred with EXONERATE (Slater & Birney 2005)  
298 using the *Lottia gigantea* genome as our reference. If exons were below 120bp (i.e., our desired bait  
299 length) in length, but longer than 50bp, we generated chimeric target sequences by fusing immediately  
300 adjacent exons. We tiled bait sequences every 60bp across each target sequence. For the conotoxin genes,  
301 we targeted 1147 conotoxins discovered from an early analysis of the 12 transcriptomes described in  
302 (Phuong *et al.* 2016). These sequences represent regions targeting 49 gene superfamilies and we included  
303 the full protein coding region plus 100bp of the 5' and 3' untranslated regions in our bait design when  
304 possible (Table S2). We tiled bait sequences every 40 bp across each conotoxin target sequence.

305 We obtained tissue samples for 32 Conidae species through field collections in Australia and  
306 Indonesia and from the collections at the Australian Museum in Sydney, Australia (Table S1). We  
307 extracted genomic DNA using an EZNA Mollusc DNA kit (Omega Bio-Tek, Doraville, GA, USA) and  
308 prepared index-specific libraries following the Meyer and Kircher (2010) protocol. We pooled 8 samples  
309 at a total concentration of 1.6µg DNA per capture reaction and allowed the baits to hybridize with the  
310 DNA for ~24 hours. We substituted the universal blockers provided with the MYbaits kit with xGEN  
311 blockers (Integrated DNA Technologies). After hybridization, we sequenced all 32 samples on a single  
312 lane HiSeq2000 lane with 100bp paired-end reads.

313

314 *Data assembly, processing, and filtration*

315 We trimmed reads for quality and adapter contamination using Trimmomatic (Bolger *et al.* 2014), merged  
316 reads using FLASH (Magoč & Salzberg 2011), generated assemblies for each sample using SPAdes  
317 (Bankevich *et al.* 2012) and reduced redundancy in the assemblies with cap3 (Huang & Madan 1999) and  
318 cd-hit (Li & Godzik 2006).

319 For the phylogenetic markers, we used BLAST+ (Altschup *et al.* 1990) to associate assembled  
320 contigs with the target sequences and used EXONERATE to redefine exon/intron boundaries because  
321 either (a) exon/intron boundaries were never denoted or (b) previously defined exons were composed of  
322 smaller fragments. For each sample, we used bowtie2 (Langmead & Salzberg 2012) to map reads to a  
323 reference containing only the contigs associated with the original target sequences and marked duplicates  
324 using picard-tools (<http://broadinstitute.github.io/picard>). We masked all positions that were below 5X  
325 coverage and removed the entire sequence if > 30% of the sequence was masked. To filter potential  
326 paralogous sequences in each species, we calculated heterozygosity (number of heterozygous sites/total  
327 number of sites) for each locus by identifying heterozygous positions using samtools and bcftools (Li *et*  
328 *al.* 2009) and removed loci that were at least two standard deviations away from the mean heterozygosity.

329 For the conotoxin sequences, it is known that traditional assemblers perform poorly in  
330 reconstructing all potential conotoxin gene copies (Lavergne *et al.* 2015; Phuong *et al.* 2016). To  
331 ameliorate this issue, we reassembled conotoxin genes using the assembler PRICE (Ruby *et al.* 2013),  
332 which employs iterative mapping and extension using paired read information to build out contigs from  
333 initial seed sequences. To identify potential seed sequences for contig extension, we first mapped reads to  
334 the entire assembly outputted by SPAdes using bowtie2. Then, we identified all sequence regions that  
335 locally aligned to any part of the original conotoxin target sequences via blastn; these regions represented  
336 our preliminary seed sequences. We kept all preliminary seed sequences that were at least 100 bp (read  
337 length of samples in this study) and extended these seeds to 100bp if the alignable region was below that  
338 threshold. When extending these initial regions, we used Tandem Repeats Finder (Benson 1999) to

339 identify simple repeats and minimize the presence of these genomic elements in the preliminary seed  
340 sequences. Often, only a subset of conotoxins are fully assembled with traditional assemblers (Phuong *et*  
341 *al.* 2016). However, when reads are mapped to these assemblies, unique conotoxin loci are similar enough  
342 to each other that relaxed mapping parameters will allow multiple copies to map to the contigs that were  
343 assembled. Therefore, multiple conotoxin copies will often map to each preliminary seed sequence. To  
344 generate seed sequences for all unique conotoxin loci, we used the python module pysam  
345 (<https://github.com/pysam-developers/pysam>) to pull all reads that mapped to regions of contigs  
346 representing the preliminary seed sequence and we reconstructed contigs from these reads using cd-hit  
347 and cap3. From these reconstructed contigs, we used blastn to identify >100bp regions that matched the  
348 original preliminary seed and used these hits as our final seeds. We merged all final seeds that were 100%  
349 identical using cd-hit, mapped reads to these seeds using bowtie2, and used PRICE to re-assemble and  
350 extend each seed sequence under 5 MPI values (90%, 92%, 94%, 96%, 98%) with only the set of reads  
351 that mapped to that initial seed. A sequence was successfully reassembled if it shared  $\geq 90\%$  identity to  
352 the original seed sequence and if the final sequence was longer than the initial seed. For each seed  
353 sequence, we only retained the longest sequence out of the 5 MPI iterations for downstream filtering.

354 In order to generate a conotoxin reference database containing sequences that included both  
355 exons and adjacent noncoding regions, we used blastn and exonerate on species that were used in the bait  
356 design to (a) perform species-specific searches between our reassembled contigs and a reference  
357 containing all conotoxins in (Phuong *et al.* 2016) and (b) define exon/intron boundaries on our  
358 reassembled contigs. In cases where a predicted terminal exon (i.e., the first or last exon of a conotoxin)  
359 was short (< 40 bp) and did not blast to any reassembled contig in our exon capture dataset, we replaced  
360 the reference conotoxin from Phuong et al 2016 with a conotoxin containing the adjacent UTR regions to  
361 aid in the sequence searches. We generated conotoxins with UTR regions using the PRICE algorithm as  
362 described above because the reference conotoxins from the final dataset in Phuong *et al.* 2016 did not  
363 include the UTR regions. With this final conotoxin reference containing sequences with exons and introns  
364 pre-defined, we used blastn to associate contigs with this reference in every species and used exonerate,

365 blastx, and tblastn to define exon/intron boundaries. When exon/intron boundaries could not be defined  
366 through these methods, we guessed the boundaries by aligning the assembled contig to the reference  
367 sequence using MAFFT and denoted the boundaries across the region of overlap with the exon in the  
368 reference sequence. For each sample, we mapped reads using bowtie2, accounted for duplicates using  
369 picard-tools, and retained sequences that had at least 10x coverage across the exons defined within each  
370 contig. We masked regions below 10x coverage and used cd-hit to merge contigs that were  $\geq 98\%$   
371 similar, generating our final conotoxin gene models. Finally, we used HapCUT (Bansal & Bafna 2008) to  
372 generate all unique haplotypes across coding regions.

373 To assess the overall effectiveness of our targeted sequencing experiment, we calculated (a)  
374 percent of reads aligned to intended targets, (b) percent duplicates, and (c) average coverage across  
375 targeted regions. To assess capture success of conotoxins, we divided the number of conotoxin transcripts  
376 successfully recovered in the exon capture dataset by the number of conotoxin transcripts discovered in  
377 Phuong *et al.* 2016 for each gene superfamily. We defined a conotoxin transcript to be successfully  
378 sequenced if  $> 80\%$  of the transcript was recovered in the exon capture experiment with  $> 90\%$  identity.  
379 To assess the ability of targeted sequencing to recover gene superfamily sequences from species that were  
380 not explicitly targeted in the bait sequences, we calculated the number of previously sequenced  
381 conotoxins that match contigs recovered in our dataset. We gathered conotoxin sequences from Genbank  
382 and ConoServer (Kaas *et al.* 2010) with species names that correspond to species in this study, merged  
383 sequences with  $98\%$  identity using cdhit, and used blastn to perform species-specific searches. We  
384 defined a conotoxin as successfully sequenced if the hypervariable mature toxin coding region aligned  
385 with  $\geq 95\%$  identity to a sequence in our dataset. We used an unpaired t-test to determine whether the  
386 probability of recovering a previously sequenced conotoxin differed depending on whether or not that  
387 species' conotoxin repertoire was incorporated in the bait sequences.

388

389 *Conotoxin genetic architecture*



390 To characterize conotoxin genetic architecture, we quantified the following values: (a) the number of  
391 exons comprising a conotoxin transcript, (b) average length of each exon, and (c) the size range of exon  
392 length. We also determined the proportion of terminal exons adjacent to UTRs by conducting sequence  
393 searches (via blastn) between contigs containing terminal exons against a database of conotoxins from  
394 Phuong *et al.* 2016 that were reassembled to contain the UTRs. To determine how traditional conotoxin  
395 precursor peptide regions are distributed among exons, we calculated the average proportion of each  
396 conotoxin region found on each exon in every gene superfamily. We defined regions of the Phuong *et al.*  
397 2016 transcripts using ConoPrec (Kaas *et al.* 2012). We restricted these conotoxin genetic structure  
398 analyses to transcripts from Phuong *et al.* 2016 that were successfully recovered in the exon capture  
399 dataset and that were retained after clustering with cd-hit (similarity threshold = 98%). We performed  
400 clustering to avoid over-inflating estimates because unique transcripts from Phuong *et al.* (2016) may  
401 have originated from the same gene.

402 To determine whether conotoxin loci are enriched for simple repetitive elements, we quantified  
403 the amount of simple repeats in noncoding regions adjacent to conotoxin exons vs. noncoding regions  
404 adjacent to non-conotoxin exons. If multiple exons were found on the same contig, we split the sequences  
405 at the midpoint in the intron region to standardize the data because most contigs contain only one exon.  
406 We used Tandem Repeat Finder to identify repeats and retained results when (a) the repeat pattern size  
407 was between 1 to 6 (i.e., mono-nucleotide repeats to hexa-nucleotide repeats), (b) the pattern was repeated  
408 at least 5 times, and (c) patterns within a repeat shared 90% identity with each other. We calculated (a)  
409 the proportion of contigs containing simple repeats and (b) the proportion of bases that comprised of  
410 simple repeats and tested the differences between conotoxins and non-conotoxin loci using paired t-tests.

411

#### 412 *Conotoxin molecular evolution*

413 We first classified all exons into conotoxin precursor peptide regions. For species with  
414 transcriptome data, we first labeled exons as either the signal region or the mature region by identifying  
415 the exons containing the largest proportion of these separate regions. Then, exons between the signal and

416 mature exon were labeled as the prepro exon(s) and exons after the mature region were labeled as the post  
417 exons. Gene superfamilies containing only a single exon were denoted as such. We then used blastn to  
418 classify sequences without transcriptome data into these conotoxin precursor peptide regions. For each  
419 functional category within each gene superfamily, we calculated uncorrected pairwise distances between  
420 all possible pairwise comparisons. To avoid spurious alignments, we only considered comparisons within  
421 clusters that clustered with cd-hit at an 80% threshold and we excluded comparisons if (a) the alignment  
422 length of the two exons was 20% greater than the longer exon, (b) the align-able noncoding region was  
423 below 50bp, or (c) the shorter exon's length was less than 70% of the length of the longer exon. We  
424 calculated separate pairwise distance estimates for regions of the alignment that contained the exon and  
425 regions of the alignment that contained the noncoding DNA. We excluded region-labeled exons within  
426 superfamilies from this analysis that had less than 50 possible comparisons. For comparison, we also  
427 calculated pairwise distances between exons and noncoding regions across our phylogenetic markers  
428 which represent non-conotoxin exons, filtered with similar criteria described above.

429

#### 430 *Conotoxin expression*

431 To characterize variation in expression patterns among species per gene superfamily, we  
432 calculated the number of conotoxin genes expressed in species with transcriptome data divided by the  
433 number of genes available in the genome. We restricted these analyses to instances where 90% of the  
434 unique mature toxins were recovered for a gene superfamily within a species. To estimate gene  
435 superfamily size, we used the exon labeled as containing most or all of the mature region. We defined a  
436 conotoxin gene as expressed if we retained a blast hit with 95% identity to a unique mature toxin  
437 sequence found in the transcriptome.

438

#### 439 *Gene superfamily size change estimation*

440 To compare and contrast gene superfamily size changes between species, we used the total  
441 number of exons containing most or all of the signal region as our estimate of gene superfamily size

442 because exons containing the signal regions are relatively conserved across species (Robinson & Norton  
443 2014) and thus have the highest confidence of being recovered through exon capture techniques. To  
444 quantify and test the amount of phylogenetic signal in conotoxin gene diversity, we estimated Pagel's  
445 lambda (Pagel 1997) in the R package phytools (Revell 2012). Lambda values range from 0 (phylogenetic  
446 independence) to 1 (phylogenetic signal) and p-values < 0.05 represent significant departure from a model  
447 of random trait distribution across species with respect to phylogeny. To estimate conotoxin gene  
448 superfamily gains and losses along every branch, we used the program CAFEv3.1 (Han *et al.* 2013),  
449 which uses a stochastic gene birth-death process to model the evolution of gene family size. As input, we  
450 used a time-calibrated phylogeny and estimates of gene superfamily size for 37 superfamilies that were  
451 present in at least 2 taxa. To estimate a time-calibrated phylogeny, we aligned loci that had at least 26  
452 species using MAFFT (Kato *et al.* 2005) and used a concatenated alignment to build a phylogeny in  
453 RAxML under a GTRGAMMA model of sequence evolution (Stamatakis 2006). We time-calibrated the  
454 phylogeny with the program r8s (Sanderson 2003) using two previous fossil calibrations described in  
455 cone snails (Duda Jr. *et al.* 2001). We excluded *Californiconus californicus* from the CAFE analysis due  
456 to optimization failures.

457

#### 458 *Diet and conotoxin gene superfamily size evolution*

459 To examine the role of diet specificity and dietary breadth on conotoxin gene superfamily size evolution  
460 and total conotoxin diversity, we retrieved prey information from the literature (Kohn 1959a; b, 1966,  
461 1968, 1978, 1981, 2001, 2003, 2015; Marsh 1971; Kohn & Nybakken 1975; Taylor 1978, 1984, 1986;  
462 Taylor & Reid 1984; Nybakken & Perron 1988; Kohn & Almasi 1993; Reichelt & Kohn 1995; Kohn *et*  
463 *al.* 2005; Nybakken 2009; Chang *et al.* 2015). For diet specificity, we classified prey items into one of 27  
464 different prey categories (Table S9). For dietary breadth, we retrieved estimates of the Shannon's  
465 diversity index ( $H'$ ) or calculated it if there were at least 5 prey items classified to genus with a unique  
466 species identifier. When multiple  $H'$  values were obtained for a species, we averaged them because  
467 species will consume different sets of prey taxa depending on geography. Raw data are available in Table

468 S9. To examine the impact of prey group and dietary breadth on changes in gene superfamily size, we  
469 used D-PGLS (distance-based phylogenetic generalized least squares), a phylogenetic regression method  
470 capable of assessing patterns in high-dimensional datasets (Adams 2014). To reduce redundancy among  
471 prey group variables, we removed variables that were 80% correlated with each other using the `redun`  
472 function in the R package `Hmisc`. We used the total number of exons containing the signal region as our  
473 estimate of gene superfamily size. To convert gene superfamily size counts into continuous variables, we  
474 transformed the data into chi-squared distances between species in ‘conotoxin gene superfamily space’  
475 using the `deostand` function in the R package `vegan` (Oksanen *et al.* 2016). To examine the impact of diet  
476 specificity and dietary breadth on total conotoxin diversity, we used a PGLS analysis implemented in the  
477 `caper` package within R (Orme 2013). We  $\ln$ -transformed total conotoxin diversity for the PGLS analysis.  
478 We performed all analyses with the full dataset and a subset of the data that only included gene  
479 superfamilies with > 80% capture success. We did not perform any analyses with *C. californicus* because  
480 it is regarded as an outlier species amongst the cone snails due to its atypical diet and its deep relationship  
481 with the rest of Conidae (Kohn 1966; Puillandre *et al.* 2014).

482

### 483 **Acknowledgements**

484 We thank DST Hariyanto, MBAP Putra, MKAA Putra, and the staff at the Indonesian Biodiversity  
485 Research Center in Denpasar, Bali for assistance in the field in Indonesia; F Criscione, F Köhler, A  
486 Moussalli, A Hogget, and L Vail for assistance in the field at the Lizard Island Research Station in  
487 Australia; M Reed, A Hallan, and J Waterhouse for access to specimens at the Australian Museum in  
488 Sydney, Australia; J Finn, M Mackenzie, and M Winterhoff for access to specimens at the Museum  
489 Victoria in Melbourne, Australia; K Bi, L Smith, and A Moussalli for advice on bait design; the  
490 Evolutionary Genetics Lab at UC Berkeley for laboratory support; MCW Lim and J Chang for thoughtful  
491 advice and discussions; N Puillandre, S Prost, and S Robinson for insightful comments on earlier versions  
492 of this manuscript. This work used the Extreme Science and Engineering Discovery Environment  
493 (XSEDE), which is supported by National Science Foundation grant number ACI-1053575. This work

494 was supported by a Grants-in-Aid of research from Sigma Xi, a Grants-in-Aid of Research from the  
495 Society for Integrative and Comparative Biology, a research grant from the Society of Systematic  
496 Biologists, a Student Research Award from the American Society of Naturalists, a National Science  
497 Foundation Graduate Research Opportunities Worldwide to Australia, the Lerner Gray Fund for Marine  
498 Research from the American Museum of Natural History, research grants from the Department of  
499 Ecology and Evolutionary Biology at UCLA, a small award from the B Shaffer Lab, a National Science  
500 Foundation Graduate Research Fellowship, an Edwin W. Pauley fellowship, and a Chateaubriand  
501 fellowship awarded to MAP. This work used the Vincent J. Coates Genomics Sequencing Laboratory at  
502 UC Berkeley, supported by NIH S10 Instrumentation Grants S10RR029668 and S10RR027303. We  
503 thank the Indonesian Ministry of State for Research and Technology (RISTEK, permit number  
504 277/SIP/FRP/SM/VIII/ 2013) for providing permission to conduct fieldwork in Bali. The *C. californicus*  
505 specimen was collected under a California Department of Fish and Wildlife collecting permit granted to  
506 WF Gilly (SC-6426).

507

508 **Figure 1. A superfamily conotoxins from *Conus lividus* described in the transcriptome from Phuong**  
509 ***et al.* 2016.**

510

511 **Figure 2. Histograms showing the frequency of the largest proportion of conotoxin precursor**  
512 **peptide regions found on a single exon in Conidae genomes.**

513

514 **Figure 3. Scatterplot of uncorrected pairwise distances for select gene superfamilies and non-**  
515 **conotoxin loci between exons and adjacent noncoding regions.**

516

517 **Figure 4. Diet and conotoxin evolution in a phylogenetic context.** Time-calibrated maximum  
518 likelihood phylogeny of 32 Conidae species generated from concatenated alignment of 4441 exons. Total  
519 conotoxin diversity and size estimates for commonly studied gene superfamilies displayed next to tip

520 names. Branches are colored base on net gains or losses in total conotoxin diversity based on CAFE  
521 analyses. Recognized subgenera are alternately colored pink.

522

523 **Figure 5. Scatterplot of total conotoxin gene diversity and dietary breadth.** Graph labeled with  
524 correlation coefficient.

525

526 **Figure S1. Conotoxin diversity per gene family per region in a phylogenetic context.**

527

528 **Figure S2. Scatterplots of all gene superfamilies showing the relationship between exon divergence  
529 and noncoding divergence.** Divergence was estimated by calculating uncorrected pairwise distances.

530

531 **Figure S3. CAFE net gene gains and losses plotted across a time-calibrated phylogeny of cone  
532 snails.** Values on branches represent the number of conotoxin genes gained or loss along that branch.  
533 Total conotoxin diversity listed next to species names.

534

### 535 **Literature cited**

536

537 Adams DC (2014) A method for assessing phylogenetic least squares models for shape and other high-  
538 dimensional multivariate data. *Evolution*, **68**, 2675–2688.

539 Altschup SF, Gish W, Pennsylvania T, Park U (1990) Basic Local Alignment Search Tool. *Journal of  
540 Molecular Biology*, **215**, 403–410.

541 Bankevich A, Nurk S, Antipov D *et al.* (2012) SPAdes: A New Genome Assembly Algorithm and Its  
542 Applications to Single-Cell Sequencing. *Journal of Computational Biology*, **19**, 455–477.

543 Bansal V, Bafna V (2008) HapCUT: An efficient and accurate algorithm for the haplotype assembly  
544 problem. *Bioinformatics*, **24**, 153–159.

545 Barghi N, Concepcion GP, Olivera BM, Lluisma AO (2015a) Structural features of conopeptide genes

- 546           inferred from partial sequences of the *Conus tribblei* genome. *Molecular Genetics and Genomics*,  
547           **291**, 411–422.
- 548 Barghi N, Concepcion GP, Olivera BM, Lluisma AO (2015b) Comparison of the venom peptides and  
549           their expression in closely related *Conus* species: insights into adaptive post-speciation evolution of  
550           *Conus* exogenomes. *Genome Biology and Evolution*, **7**, 1797–1814.
- 551 Barlow A, Pook CE, Harrison RA, Wüster W (2009) Coevolution of diet and prey-specific venom  
552           activity supports the role of selection in snake venom evolution. *Proceedings. Biological sciences /*  
553           *The Royal Society*, **276**, 2443–2449.
- 554 Benson G (1999) Tandem Repeats Finder: a program to analyse DNA sequences. *Nucleic Acids Res.*, **27**,  
555           573–578.
- 556 Bi K, Vanderpool D, Singhal S *et al.* (2012) Transcriptome-based exon capture enables highly cost-  
557           effective comparative genomic data collection at moderate evolutionary scales. *BMC Genomics*, **13**,  
558           403.
- 559 Bolger AM, Lohse M, Usadel B (2014) Trimmomatic: a flexible trimmer for Illumina sequence data.  
560           *Bioinformatics (Oxford, England)*, 1–7.
- 561 Brawand D, Wagner CE, Li YI *et al.* (2014) The genomic substrate for adaptive radiation in African  
562           cichlid fish. *Nature*.
- 563 Casewell NR, Harrison RA, Wüster W, Wagstaff SC (2009) Comparative venom gland transcriptome  
564           surveys of the saw-scaled vipers (Viperidae: Echis) reveal substantial intra-family gene diversity  
565           and novel venom transcripts. *BMC Genomics*, **10**, 564.
- 566 Casewell NR, Wüster W, Vonk FJ, Harrison RA, Fry BG (2013) Complex cocktails: the evolutionary  
567           novelty of venoms. *Trends in ecology & evolution*, **28**, 219–29.
- 568 Chang D, Duda TF (2012) Extensive and continuous duplication facilitates rapid evolution and  
569           diversification of gene families. *Molecular biology and evolution*, **29**, 2019–29.
- 570 Chang D, Duda TF (2014) Application of community phylogenetic approaches to understand gene  
571           expression: differential exploration of venom gene space in predatory marine gastropods. *BMC*

- 572 *evolutionary biology*, **14**, 123.
- 573 Chang D, Duda TF (2016) Age-related association of venom gene expression and diet of predatory  
574 gastropods. *BMC Evolutionary Biology*, **16**, 27.
- 575 Chang D, Olenzek AM, Duda Jr. TF (2015) Effects of geographical heterogeneity in species interactions  
576 on the evolution of venom genes. *Proceedings of the Royal Society B*.
- 577 Cornetti L, Valente LM, Dunning LT *et al.* (2015) The genome of the “great speciator” provides insights  
578 into bird diversification. *Genome Biology and Evolution*, **7**, 2680–2691.
- 579 Daltry JC, Wüster W, Thorpe RS (1996) Diet and snake venom evolution. *Nature*.
- 580 Dowell NL, Giorgianni MW, Kassner VA *et al.* (2016) The deep origin and recent loss of venom toxin  
581 genes in rattlesnake. *Current Biology*, **In press**, 2434–2445.
- 582 Duda TF (2008) Differentiation of venoms of predatory marine gastropods: divergence of orthologous  
583 toxin genes of closely related *Conus* species with different dietary specializations. *Journal of*  
584 *molecular evolution*, **67**, 315–21.
- 585 Duda Jr. TF, Kohn AJ, Palumbi SR (2001) Origins of diverse feeding ecologies within *Conus*, a genus of  
586 venomous marine gastropods. *Biological Journal of the Linnean Society*, **73**, 391–409.
- 587 Duda TF, Lee T (2009) Ecological release and venom evolution of a predatory marine snail at Easter  
588 Island. *PloS one*, **4**.
- 589 Duda TF, Palumbi SR (1999) Molecular genetics of ecological diversification: duplication and rapid  
590 evolution of toxin genes of the venomous gastropod *Conus*. *Proceedings of the National Academy of*  
591 *Sciences of the United States of America*, **96**, 6820–3.
- 592 Duda TF, Remigio EA (2008) Variation and evolution of toxin gene expression patterns of six closely  
593 related venomous marine snails. *Molecular ecology*, **17**, 3018–32.
- 594 Faircloth BC, McCormack JE, Crawford NG *et al.* (2012) Ultraconserved Elements Anchor Thousands of  
595 Genetic Markers Spanning Multiple Evolutionary Timescales. *Systematic biology*.
- 596 Fry BG, Roelants K, Champagne DE *et al.* (2009) The toxicogenomic multiverse: convergent recruitment  
597 of proteins into animal venoms. *Annual review of genomics and human genetics*, **10**, 483–511.



- 598 Gibbs HL, Rossiter W (2008) Rapid evolution by positive selection and gene gain and loss: PLA(2)  
599 venom genes in closely related Sistrurus rattlesnakes with divergent diets. *Journal of molecular*  
600 *evolution*, **66**, 151–66.
- 601 Gibbs HL, Sanz L, Sovic MG, Calvete JJ (2013) Phylogeny-based comparative analysis of venom  
602 proteome variation in a clade of rattlesnakes (Sistrurus sp.). *PloS one*, **8**.
- 603 Guillén Y, Rius N, Delprat A *et al.* (2014) Genomics of ecological adaptation in cactophilic *Drosophila*.  
604 *Genome Biology and Evolution*, **7**, 349–366.
- 605 Han M V., Thomas GWC, Lugo-Martinez J, Hahn MW (2013) Estimating gene gain and loss rates in the  
606 presence of error in genome assembly and annotation using CAFE 3. *Molecular Biology and*  
607 *Evolution*, **30**, 1987–1997.
- 608 Henrissat B, Martínez AT, Otiillar R *et al.* (2012) The Paleozoic Origin of Enzymatic from 31 Fungal  
609 Genomes. *Science (New York, N.Y.)*, **336**, 1715–1719.
- 610 Huang X, Madan A (1999) CAP3: A DNA sequence assembly program. *Genome Research*, **9**, 868–877.
- 611 Hughes AL, Yeager M (1997) Comparative evolutionary rates of introns and exons in murine rodents. *J*  
612 *Mol Evol*, **45**, 125–130.
- 613 Jin A, Dutertre S, Kaas Q *et al.* (2013) Transcriptomic messiness in the venom duct of *Conus miles*  
614 contributes to conotoxin diversity. *Molecular & cellular proteomics*, **12**, 3824–33.
- 615 Kaas Q, Westermann J-C, Craik DJ (2010) Conopeptide characterization and classifications: an analysis  
616 using ConoServer. *Toxicon*, **55**, 1491–509.
- 617 Kaas Q, Yu R, Jin A-H, Dutertre S, Craik DJ (2012) ConoServer: updated content, knowledge, and  
618 discovery tools in the conopeptide database. *Nucleic acids research*, **40**, D325-30.
- 619 Katoh K, Kuma K-I, Toh H, Miyata T (2005) MAFFT version 5: Improvement in accuracy of multiple  
620 sequence alignment. *Nucleic Acids Research*, **33**, 511–518.
- 621 Kirschner M, Gerhart J (1998) Evolvability. *Proceedings of the National Academy of Sciences of the*  
622 *United States of America*, **95**, 8420–8427.
- 623 Kohn AJ (1959a) Ecological notes on *Conus* (Mollusca: Gastropoda) in the Trincomalee region of

- 624 Ceylon. *Annals and Magazine of Natural History*, **2**, 308–320.
- 625 Kohn AJ (1959b) The ecology of *Conus* in Hawaii. *Ecological Monographs*, **29**, 47–90.
- 626 Kohn AJ (1966) Food specialization in *Conus* in Hawaii and California. *Ecology*, **47**, 1041–1043.
- 627 Kohn AJ (1968) Microhabitats, abundance and food of *Conus* on atoll reef's in the Maldive and Chagos  
628 islands. *Ecology*, **49**, 1046–1062.
- 629 Kohn AJ (1978) Ecological Shift and Release in an Isolated Population: *Conus miliaris* at Easter Island.  
630 *Ecological Monographs*, **48**, 323–336.
- 631 Kohn AJ (1981) Abundance, diversity, and resource use in an assemblage of *Conus* species in Enewetak  
632 Lagoon. *Pacific Science*, **34**, 359–369.
- 633 Kohn AJ (2001) Maximal species richness in *Conus*: diversity, diet and habitat on reefs of northeast  
634 Papua New Guinea. *Coral Reefs*, **20**, 25–38.
- 635 Kohn AJ (2003) Biology of *Conus* on shores of the Dampier Archipelago, Northwestern Australia.
- 636 Kohn AJ (2015) Ecology of *Conus* on Seychelles reefs at mid-twentieth century: comparative habitat use  
637 and trophic roles of co-occurring congeners. *Marine Biology*, **162**, 2391–2407.
- 638 Kohn A, Almasi K (1993) Comparative ecology of a biogeographically heterogeneous *Conus* assemblage.  
639 In: *Proceedings of the Fifth International Marine Biological Workshop: The Marine Flora and*  
640 *Fauna of Rottneest Island.*, pp. 509–521.
- 641 Kohn AJ, Curran KM, Mathis BJ (2005) Diets of the predatory gastropods *Cominella* and *Conus* at  
642 Esperance , Western Australia. *Ecology*.
- 643 Kohn AJ, Nybakken JW (1975) Ecology of *Conus* on eastern Indian Ocean fringing reefs: diversity of  
644 species and resource utilization. *Marine Biology*, **29**, 211–234.
- 645 Kordis D, Gubensek F (2000) Adaptive evolution of animal toxin multigene families. *Gene*, **261**, 43–52.
- 646 Langmead B, Salzberg SL (2012) Fast gapped-read alignment with Bowtie 2. *Nature methods*, **9**, 357–9.
- 647 Lavergne V, Harliwong I, Jones A *et al.* (2015) Optimized deep-targeted proteotranscriptomic profiling  
648 reveals unexplored *Conus* toxin diversity and novel cysteine frameworks. *Proceedings of the*  
649 *National Academy of Sciences*, **112**.

- 650 Lewis RJ (2009) Conotoxins: Molecular and therapeutic targets. In: *Marine Toxins as Research Tools*
- 651 Li M, Fry BG, Kini RM (2005) Eggs-only diet: Its implications for the toxin profile changes and ecology
- 652 of the marbled sea snake (*Aipysurus eydouxii*). *Journal of Molecular Evolution*, **60**, 81–89.
- 653 Li W, Godzik A (2006) Cd-hit: a fast program for clustering and comparing large sets of protein or
- 654 nucleotide sequences. *Bioinformatics*, **22**, 1658–9.
- 655 Li H, Handsaker B, Wysoker A *et al.* (2009) The Sequence Alignment/Map format and SAMtools.
- 656 *Bioinformatics (Oxford, England)*, **25**, 2078–9.
- 657 Magoč T, Salzberg SL (2011) FLASH: fast length adjustment of short reads to improve genome
- 658 assemblies. *Bioinformatics*, **27**, 2957–63.
- 659 Malmstrøm M, Matschiner M, Tørresen OK *et al.* (2016) Evolution of the immune system influences
- 660 speciation rates in teleost fishes. *Nature Genetics*, **48**.
- 661 Marsh H (1971) Observations on the food and feeding of some vermivorous *Conus* on the Great Barrier
- 662 Reef. *The veliger*.
- 663 Metz EC, Robles-Sikisaka R, Vacquier VD (1998) Nonsynonymous substitution in abalone sperm
- 664 fertilization genes exceeds substitution in introns and mitochondrial DNA. *Proceedings of the*
- 665 *National Academy of Sciences USA*, **95**, 10676–10681.
- 666 Meyer M, Kircher M (2010) Illumina sequencing library preparation for highly multiplexed target capture
- 667 and sequencing. *Cold Spring Harbor protocols*, **2010**, doi:10.1101/pdb.prot5448.
- 668 Nakashima K, Nobuhisa I, Deshimaru M *et al.* (1995) Accelerated evolution in the protein-coding regions
- 669 is universal in crotalinae snake venom gland phospholipase A2 isozyme genes. *Proceedings of the*
- 670 *National Academy of Sciences*, **92**, 5605–5609.
- 671 Nakashima K, Ogawa T, Oda N *et al.* (1993) Accelerated evolution of *Trimeresurus flavoviridis* venom
- 672 gland phospholipase A2 isozymes. *Proceedings of the National Academy of Sciences*, **90**, 5964–
- 673 5968.
- 674 Nybakken J (2009) Ontogenetic change in the *conus radla*, its form, distribution among the radula types,
- 675 and significance in systematics and ecology. *Malacologia*, **32**, 35–54.

- 676 Nybakken J, Perron F (1988) Ontogenetic change in the radula of *Conus magus* (Gastropoda). *Marine*  
677 *Biology*, **98**, 239–242.
- 678 Oksanen J, Blanchet FG, Friendly M *et al.* (2016) vegan: Community Ecology PAKage.
- 679 Olivera BM (1997) Conus venom peptides, receptor and ion channel targets, and drug design: 50 million  
680 years of neuropharmacology. *Molecular biology of the cell*, **8**, 2101–9.
- 681 Olivera BM, Teichert RW (2007) Diversity of the neurotoxic *Conus* peptides. *Molecular interventions*, **7**,  
682 251–260.
- 683 Orme D (2013) The caper package : comparative analysis of phylogenetics and evolution in R. , 1–36.
- 684 Pagel M (1997) Inferring evolutionary processes from phylogenies. *Zoologica Scripta*, **26**, 331–348.
- 685 Pease JB, Haak DC, Hahn MW, Moyle LC (2016) Phylogenomics Reveals Three Sources of Adaptive  
686 Variation during a Rapid Radiation. *PLoS Biology*, **14**, 1–24.
- 687 Phuong MA, Mahardika GN, Alfaro ME (2016) Dietary breadth is positively correlated with venom  
688 complexity in cone snails. *BMC Genomics*, **17**, 401.
- 689 Puillandre N, Bouchet P, Duda TF *et al.* (2014) Molecular phylogeny and evolution of the cone snails  
690 (Gastropoda, Conoidea). *Molecular phylogenetics and evolution*, **78**, 290–303.
- 691 Puillandre N, Koua D, Favreau P, Olivera BM, Stöcklin R (2012) Molecular phylogeny, classification and  
692 evolution of conopeptides. *Journal of molecular evolution*, **74**, 297–309.
- 693 Puillandre N, Watkins M, Olivera BM (2010) Evolution of *Conus* peptide genes: duplication and positive  
694 selection in the A-superfamily. *Journal of molecular evolution*, **70**, 190–202.
- 695 Reichelt R, Kohn A (1995) Feeding and distribution of predatory gastropods on some great barrier reef  
696 platforms. *Proceedings of the Fifth International Coral Reef Congress*, **1985**, 191–196.
- 697 Revell LJ (2012) phytools: An R package for phylogenetic comparative biology (and other things).  
698 *Methods in Ecology and Evolution*, **3**, 217–223.
- 699 Revell L, Harmon L, Collar D (2008) Phylogenetic Signal, Evolutionary Process, and Rate. *Systematic*  
700 *Biology*, **57**, 591–601.
- 701 Robinson S, Norton R (2014) Conotoxin Gene Superfamilies. *Marine Drugs*, **12**, 6058–6101.

- 702 Ruby JG, Bellare P, Derisi JL (2013) PRICE: software for the targeted assembly of components of (Meta)  
703 genomic sequence data. *G3 (Bethesda, Md.)*, **3**, 865–80.
- 704 Sanderson MJ (2003) r8s: inferring absolute rates of molecular evolution and divergence times in the  
705 absence of a molecular clock. *Bioinformatics*, **19**, 301–302.
- 706 Slater GSC, Birney E (2005) Automated generation of heuristics for biological sequence comparison.  
707 *BMC bioinformatics*, **6**, 31.
- 708 Stamatakis A (2006) RAxML-VI-HPC: Maximum likelihood-based phylogenetic analyses with thousands  
709 of taxa and mixed models. *Bioinformatics*, **22**, 2688–2690.
- 710 Taylor JD (1978) Habitats and diet of predatory gastropods at addu atoll, maldives. *Journal of*  
711 *Experimental Marine Biology and Ecology*, **31**, 83–103.
- 712 Taylor JD (1984) A partial food web involving predatory gastropods on a pacific fringing reef. *Journal of*  
713 *Experimental Marine Biology and Ecology*, **14**, 273–290.
- 714 Taylor J (1986) Diets of sand-living predatory gastropods at Piti Bay, Guam. *Asian Marine Biology*, **3**,  
715 47–58.
- 716 Taylor JD, Reid DG (1984) The abundance and trophic classification of molluscs upon coral reefs in the  
717 Sudanese Red Sea. *Journal of Natural History*, **18**, 175–209.
- 718 Teasdale LC, Köhler F, Murray KD, O'Hara T, Moussalli A (2016) Identification and qualification of 500  
719 nuclear, single-copy, orthologous genes for the Eupulmonata (Gastropoda) using transcriptome  
720 sequencing and exon capture. *Molecular Ecology Resources*, **16**, 1107–1123.
- 721 Wu Y, Wang L, Zhou M *et al.* (2013) Molecular evolution and diversity of *Conus* peptide toxins, as  
722 revealed by gene structure and intron sequence analyses. *PloS one*, **8**, e82495.
- 723 Yang AS (2001) Modularity, evolvability, and adaptive radiations: a comparison of the hemi- and  
724 holometabolous insects. *Evolution & development*, **3**, 59–72.
- 725

| Signal region                                                                                                                                                           | Mature toxin region |
|-------------------------------------------------------------------------------------------------------------------------------------------------------------------------|---------------------|
| MGMRMME T V F L L V V L A T T V V S F T L D H A S D G R N D A A N N K A N D I T M A L E V R G C C S D P P C R H K H D L C G *                                           |                     |
| MGMRMME T V F L L V V L A T T V V S -- D H A S D G R N D A A K V K W S K T V E P -- - C C E N P P C E A V N S A L C G A R R *                                           |                     |
| MGMRMME T V F L L V V L A T T V V S F T L D H A S D G R N A A A G R K A A A R I A Q T V R G P C C S S P A C A A V H P C A C A G R R *                                   |                     |
| MGMRMME T V F L L V V L A T T V V S F T L D H A S N G R N A V A S Y D P E I -- -- -- - C C N H G P C H V S E P Q L C C S R P C C K S *                                  |                     |
| MGMRMME T V F L L V V L A T T V V S F T L D H A S D G R G A A A N D K A I D Q I A Q T A R E P C C S N P P C A Q H H P E I C -- R R M I Q N P P N H D M S P S A *        |                     |
| MGMRMME T V F L L V V L A T T V V S F T L D H A S D G R N D A A N D K A S D D I A Q T A R E P C C S N P P C A H E N C R R R R *                                         |                     |
| MGMRMME T V F L L V V L A T T V V S F T L D H A S D S R G A A A N D K A I D Q I A L A V R I D W C D D A D R V D H P E L C C R D V C C A Y P P C R H K H O D C N Q G R * |                     |
| MGMRMME T V F L L V V L A T T V V S F T L D H A S D S R G A A A N D K A I D Q I A L A V R I D W C D D A D R V D H P E L C C R D V C C A Y P P C R H K H O D C N Q G R * |                     |
| MGMRMME T V F L L V V L A T T V V S V -- - R V S N G R N A A A K S K A P A T V E L T V R E P C C S D P R C S V K P E N V C G *                                          |                     |
| MGMRMME T V F L L V V L S T T V V S F P A V D H A S N G R D A A A D N N A A D Q I A Q T A R E P C C S N P P C A Q H H P E I C -- R R M I Q N P P N H D M S P S A *      |                     |
| MGMRMME T V F L L V A L A T T V V S F T L D H A S N G R N A A A D I R R S D I A Q T A R E P C C S N P P C A H E N C R R R R *                                           |                     |
| MGMRMME T V F L L V A L A T T V V S F T L D H A S N G R N A A A D G R S D I A Q T A R E P C C S N P P C A H E N C R R R *                                               |                     |
| MGMRMME T V F L L V A L A T T V V S F T L D H A S N G R N A A A D N R S D I A L A V R Q C C E N P P C S I O O C E P *                                                   |                     |
| MGMRMME T V F L L V V L A T T V V A -- - L D R V S N G R N A A A K S K A P A T V E L T V R E A C C S D P R C S A B H Q D I C G *                                        |                     |
| MGMRMME T V F L L V V L A T T V V S F P L D H A S N G R D A A A Y D K A P A T V E L T V R E R C C S H P A C G E N P D D V C B *                                         |                     |
| MGMRMME T V F L L V A L A T T V V S F T L D H A S N G R N A A A D D N M S D I A Q T A R E P C C S N P P C A H V N C R C R R *                                           |                     |
| MGMRMME T V F L L V V L S T T V V S F P A V D H A S N G R D A A A D N N A A D Q I A Q T A R E P C C S N P P C A Q H H P E I C -- R R M I Q N P P N H D M S P S A *      |                     |
| MGMRMME T V F L L V V L S T T V V S F P A V D H A S N G R D A A A D S N A A D Q I A Q T A R E P C C S N P P C A Q H H P E I C -- R R M I Q N P P N H D M S P S A *      |                     |
| MGMRMME T V F L L V V L A T T V V S F T L D H A S N G R N A A A D S R A A D I A Q T V R G R R K T A P P S P C S S G M N I A P P P A V P *                               |                     |
| MGMRMME T V F L L V V L A T T V V S -- - D H A S D G R N D A A K V K W S K T V E P -- -- - C C E N P P C E A V N S D L C G A R R *                                      |                     |
| MGMRMME T V F L L V V L A T T V V S -- - H A S D G R N D A A K V K W S K T V E P -- -- - C C E N P P C E A V N S D L C G A R R *                                        |                     |

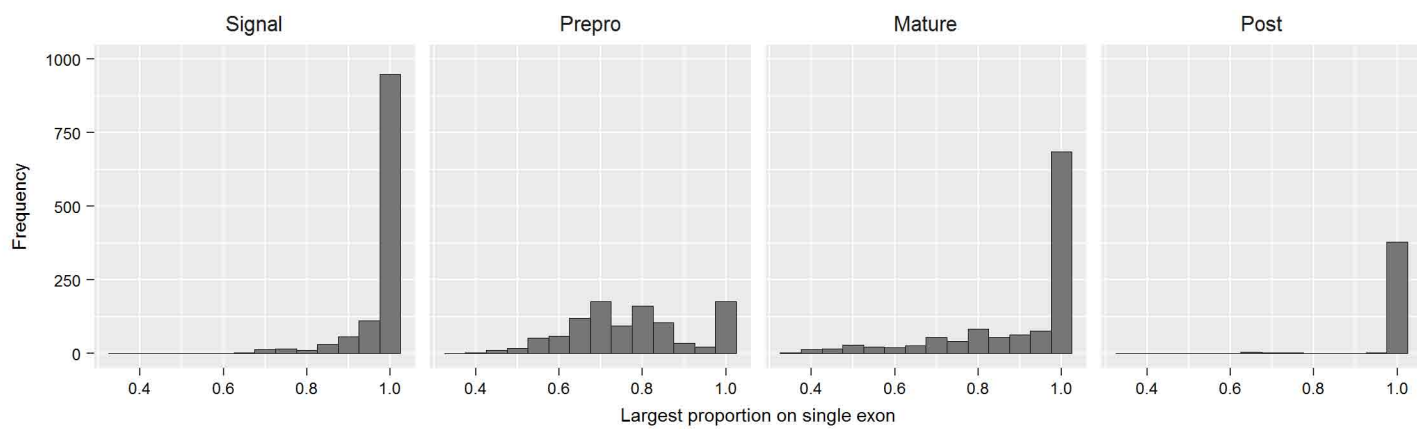

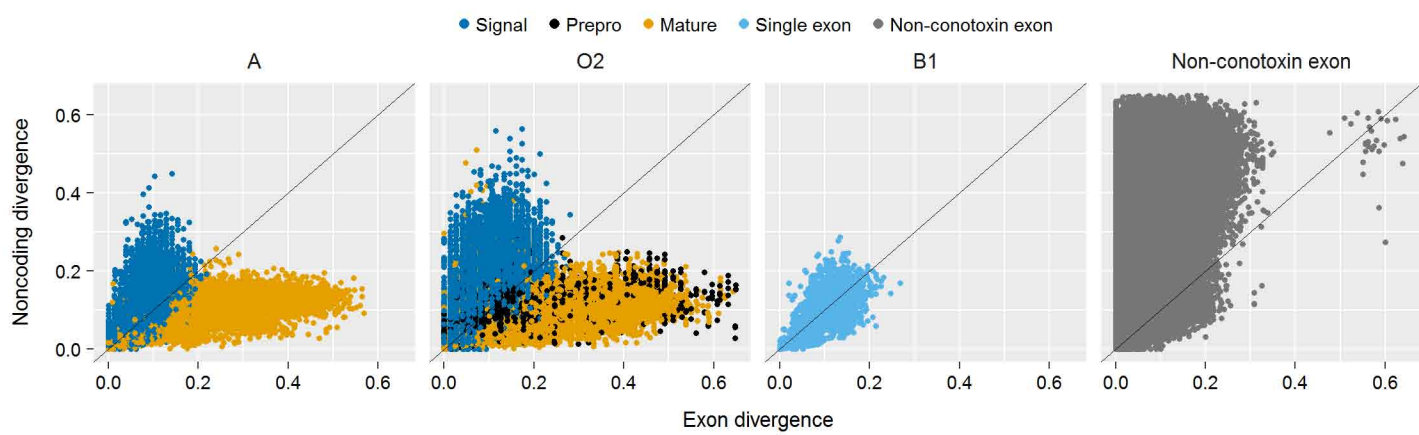



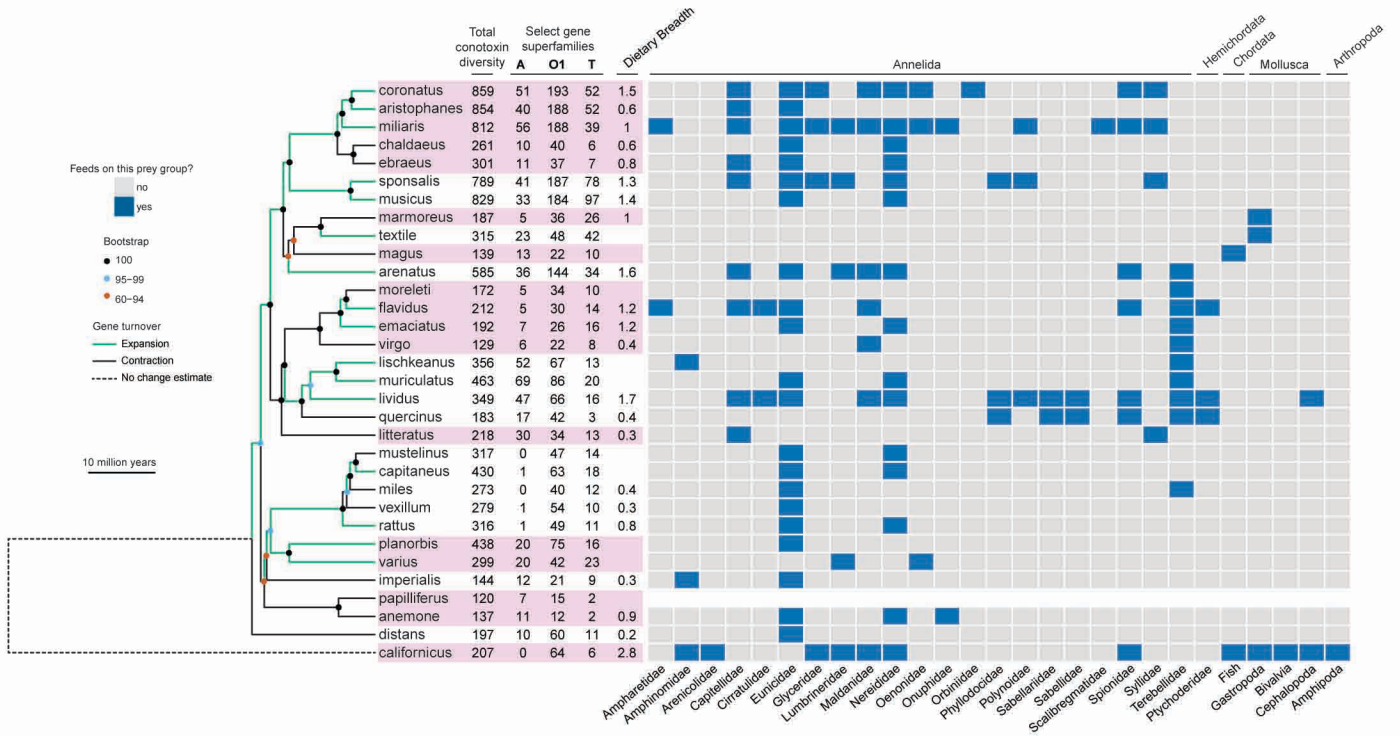

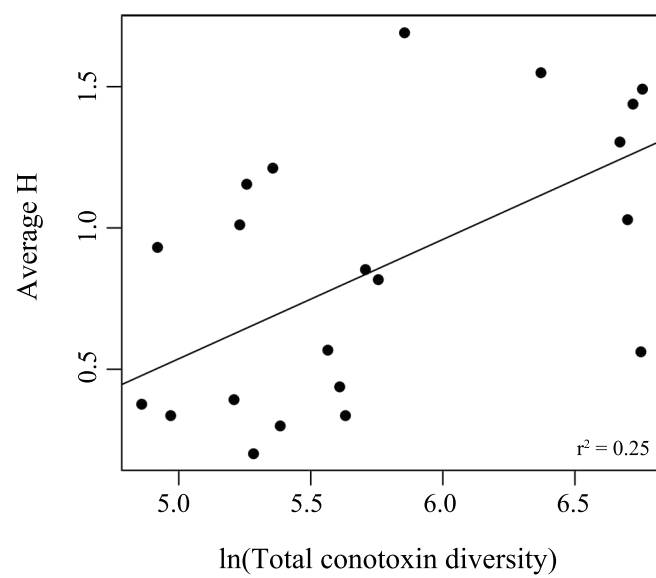

Source: https://www.biorxiv.org/content/biorxiv/early/2017/02/10/107672.full.pdf
